# Supplementary material for: Relationship between the Mediterranean Diet Score in Pregnancy and the Incidence of Asthma at 4 Years of Age: The Japan Environment and Children’s Study
Source: MDPI journal article supplement (doi:10.3390/nu15071772), 2023-04-05
Supplement: s1 [file s1]

**Table S1. Comparison of allergic outcomes between the two PMDS groups before excluding**

| <b>Type1 allergy</b>           | <b><u>All children</u></b> |                       |          | <b><u>Maternal allergies group</u></b> |                       |          | <b><u>No maternal allergies group</u></b> |                       |          |
|--------------------------------|----------------------------|-----------------------|----------|----------------------------------------|-----------------------|----------|-------------------------------------------|-----------------------|----------|
|                                | PMDS High<br>(n=51124)     | PMDS Low<br>(n=23363) | <i>p</i> | PMDS High<br>(n=26136)                 | PMDS Low<br>(n=11299) | <i>p</i> | PMDS High<br>(n=24988)                    | PMDS Low<br>(n=12064) | <i>p</i> |
| One or more<br>(%)             | 12454<br>(24.4)            | 5750<br>(24.6)        | 0.465    | 7771<br>(29.7)                         | 3435<br>(30.4)        | 0.199    | 4683<br>(18.7)                            | 2315<br>(19.2)        | 0.308    |
| Asthma<br>(%)                  | 4316<br>(8.4)              | 2104<br>(9.0)         | 0.012    | 2676<br>(10.2)                         | 1221<br>(10.8)        | 0.416    | 1640<br>(6.6)                             | 883<br>(7.3)          | 0.007    |
| Food allergy<br>(%)            | 2847<br>(5.6)              | 1317<br>(5.6)         | 0.719    | 1779<br>(6.8)                          | 796<br>(7.0)          | 0.416    | 1068<br>(4.3)                             | 521<br>(4.3)          | 0.864    |
| Atopic dermatitis<br>(%)       | 4234<br>(8.3)              | 1981<br>(8.5)         | 0.374    | 2714<br>(10.4)                         | 1211<br>(10.7)        | 0.343    | 1520<br>(6.1)                             | 770<br>(6.4)          | 0.271    |
| Allergic conjunctivitis<br>(%) | 1369<br>(2.7)              | 601<br>(2.6)          | 0.420    | 939<br>(3.6)                           | 397<br>(3.5)          | 0.727    | 430<br>(1.7)                              | 204<br>(1.7)          | 0.869    |
| Allergic rhinitis<br>(%)       | 3843<br>(7.5)              | 1750<br>(7.5)         | 0.910    | 2601<br>(10.0)                         | 1139<br>(10.1)        | 0.717    | 1242<br>(5.0)                             | 611<br>(5.1)          | 0.715    |

PMDS: the Mediterranean diet scale in pregnancy
