# Supplementary figures and images for: Relationship between the Mediterranean Diet Score in Pregnancy and the Incidence of Asthma at 4 Years of Age: The Japan Environment and Children’s Study
Source: MDPI journal article supplement (doi:10.3390/nu15071772), 2023-04-05

**Figure S1.** Incidence of asthma in each dietary intake range

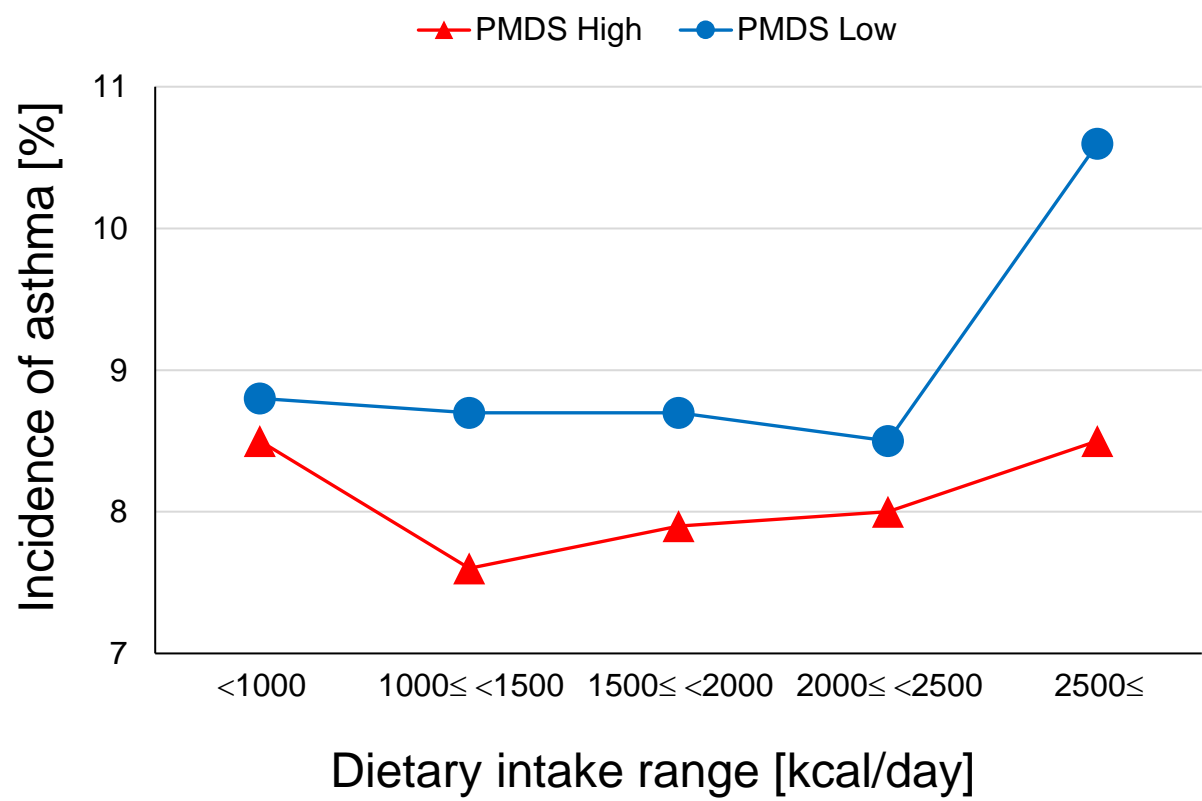

Supplement: s1 [file s1]
